# Supplementary material for: Constructing a full-space internal electric field in a hematite photoanode to facilitate photogenerated-carrier separation and transfer
Source: Royal Society of Chemistry journal article supplement (doi:10.1039/d2ta00632d), 2022-01-01
Supplement: d2ta00632d1.pdf [file d2ta00632d1.pdf]

## Supplementary Information

### **Constructing a full-space internal electric field in hematite photoanode to facilitate photogenerated-carrier separation and transfer**

Zhongyuan Zhou,<sup>a,b</sup> Yiyi Wang,<sup>a</sup> Liuqing Li,<sup>b</sup> Liguang Yang,<sup>a</sup> Yongsheng Niu,<sup>a</sup> Youzhu Yu,<sup>a</sup> Yao Guo,<sup>c,\*</sup> and Shaolong Wu<sup>b,\*</sup>

<sup>a</sup>School of Chemical and Environmental Engineering, Anyang Institute of Technology, Anyang 455000, China.

<sup>b</sup>School of Optoelectronic Science and Engineering, Soochow University, Suzhou 215006, China. Email: shaolong\_wu@suda.edu.cn

<sup>c</sup>School of Materials Science and Engineering, Anyang Institute of Technology, Anyang 455000, China. Email: guoyao@ayit.edu.cn

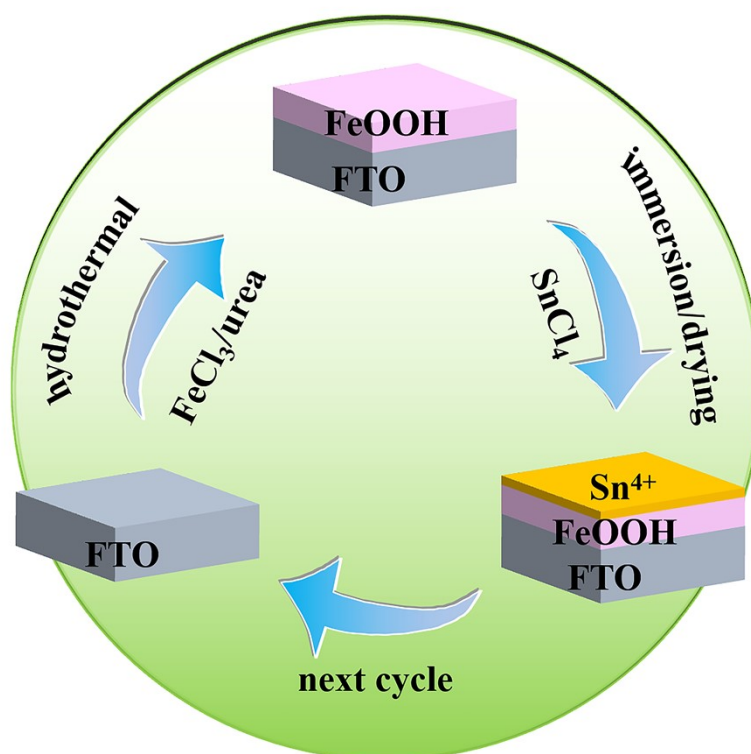

**Fig. S1** Schematic illustration of one-cycle growth process of the FeOOH film with Sn-dopant absorption. The FTO glass was used as the conductive substrate.

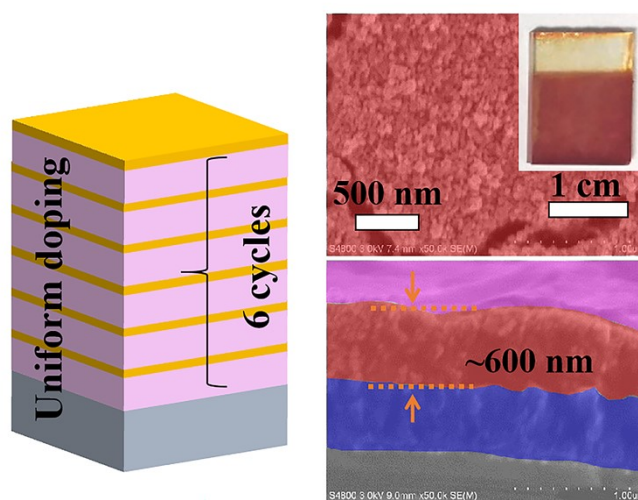

**Fig. S2** Schematic of the  $\alpha$ -Fe<sub>2</sub>O<sub>3</sub> photoanodes prepared with six growth cycles. The corresponding SEM images and digital photos are also included.

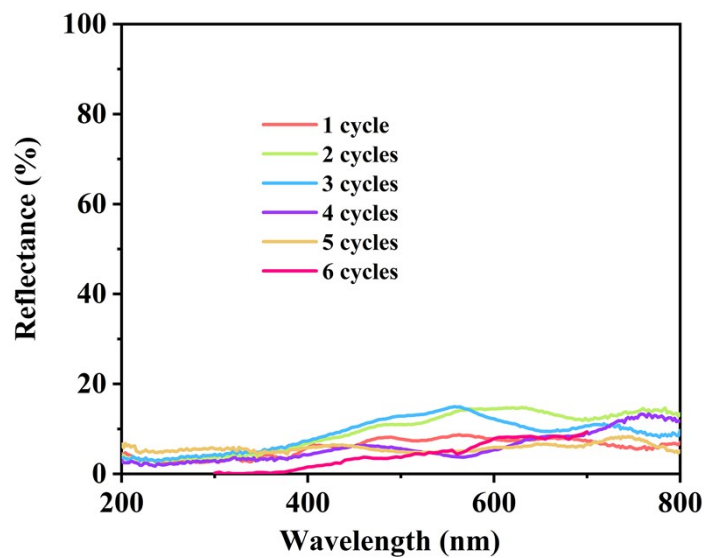

**Fig. S3** Reflectance spectra of the  $\alpha$ -Fe<sub>2</sub>O<sub>3</sub> photoanodes with uniform doping prepared by different growth cycles.

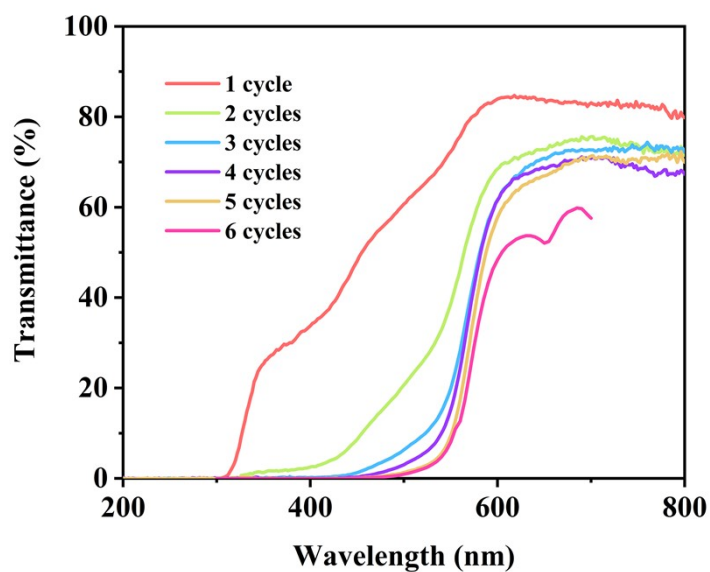

**Fig. S4** Transmittance spectra of the  $\alpha$ -Fe<sub>2</sub>O<sub>3</sub> photoanodes with uniform doping prepared by different growth cycles.

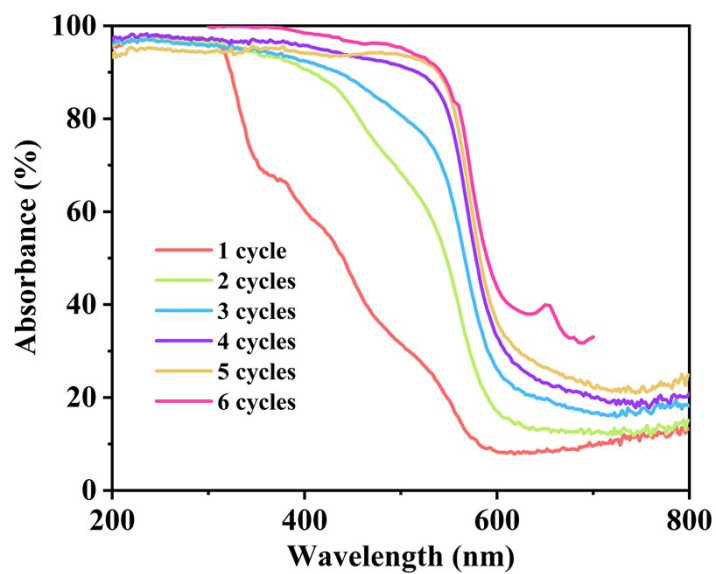

**Fig. S5** Absorbance spectra of the  $\alpha$ -Fe<sub>2</sub>O<sub>3</sub> photoanodes with uniform doping prepared by different growth cycles.

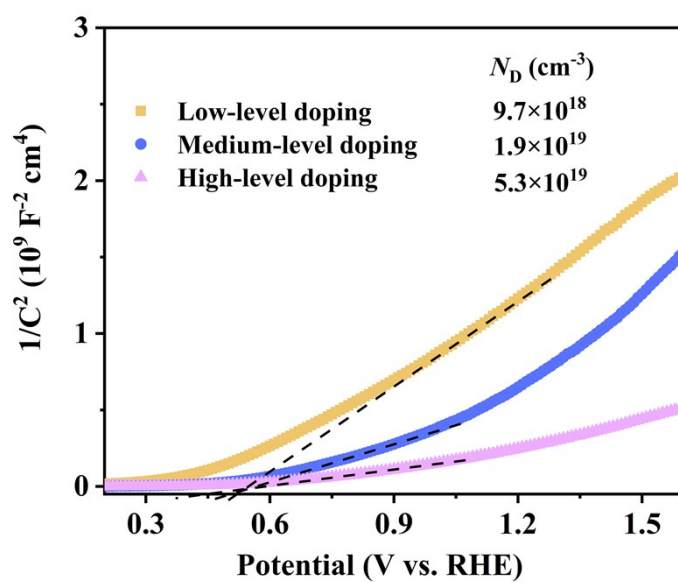

**Fig. S6** Mott-schottky plots of the  $\alpha$ -Fe<sub>2</sub>O<sub>3</sub> photoanodes with low-level, medium-level or high-level doping of Sn.

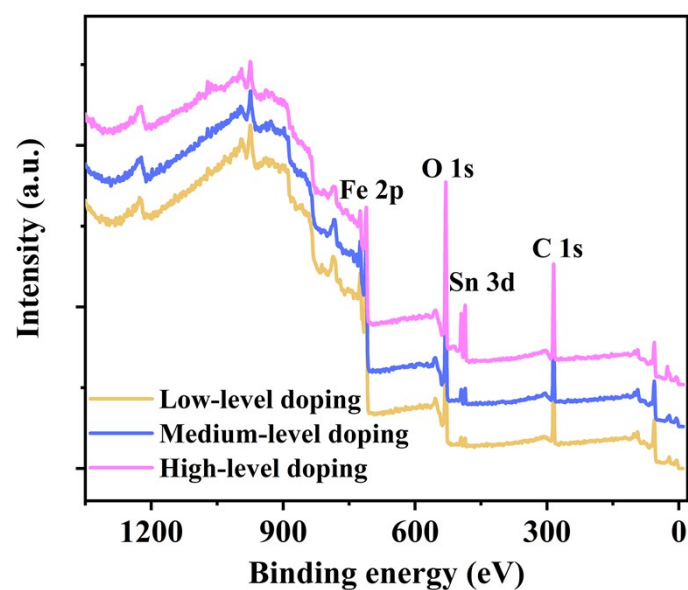

**Fig. S7** XPS spectra of the  $\alpha$ - $\text{Fe}_2\text{O}_3$  photoanodes with low-level, medium-level and high-level doping of Sn.

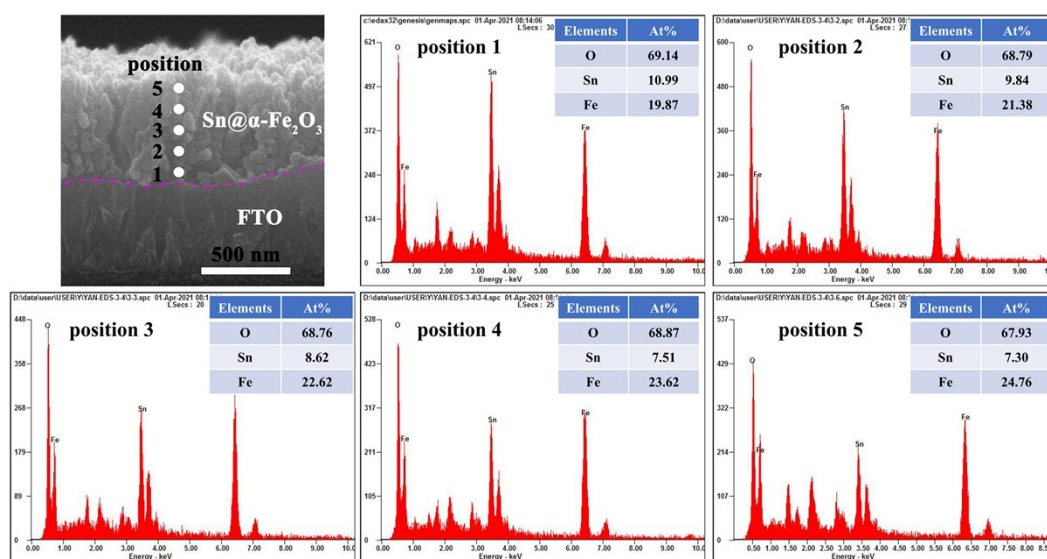

**Fig. S8** EDS comparison of the  $\alpha$ - $\text{Fe}_2\text{O}_3$  photoanode with gradient-decreasing doping of Sn at various positions.

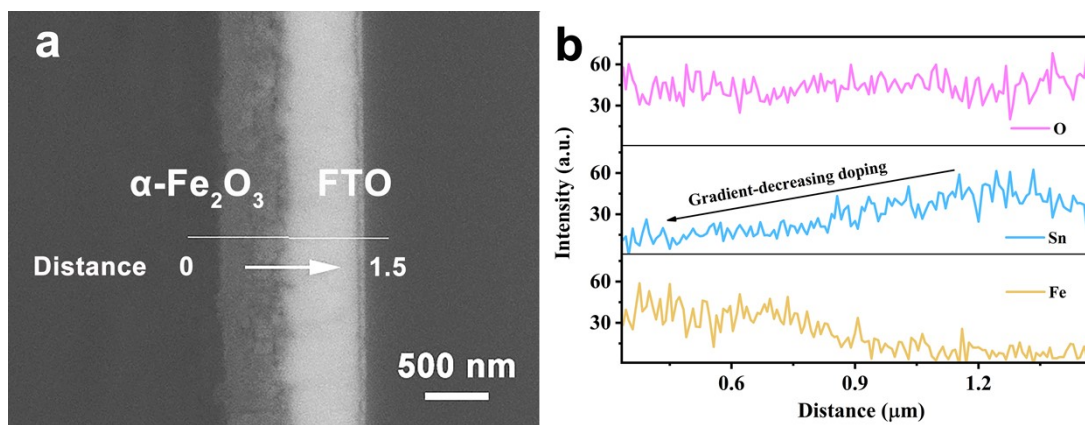

**Fig. S9** Eelements linear scan of  $\alpha\text{-Fe}_2\text{O}_3$  photoanodes with gradient-decreasing doping.

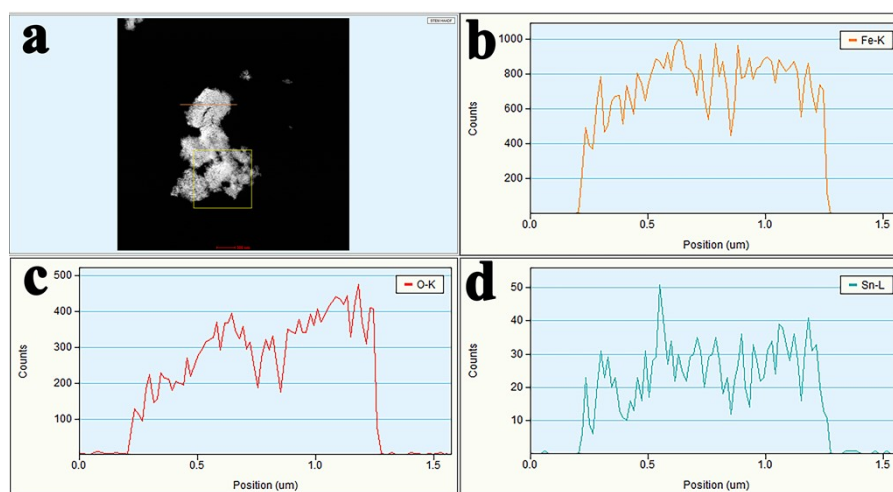

**Fig. S10** EDS element line scanning for the  $\alpha\text{-Fe}_2\text{O}_3$  photoanode with gradient-decreasing doping of Sn.

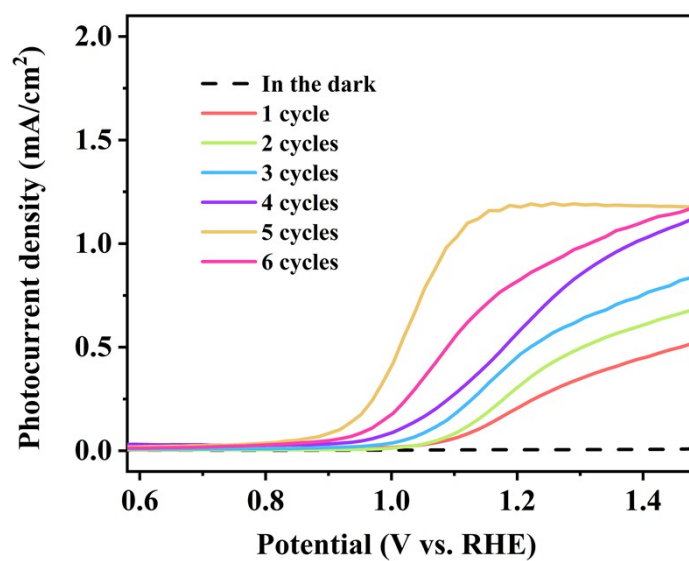

**Fig. S11**  $J$ - $V$  curves of the  $\alpha$ - $\text{Fe}_2\text{O}_3$  photoanodes with uniform doping prepared by different growth cycles.

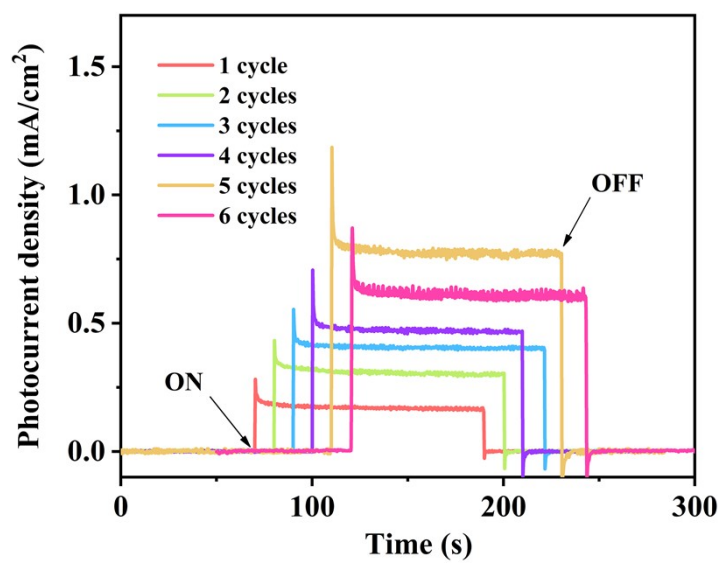

**Fig. S12**  $J$ - $t$  curves of the  $\alpha$ - $\text{Fe}_2\text{O}_3$  photoanodes with uniform doping prepared by different growth cycles at  $1.23 \text{ V}_{\text{RHE}}$  under ON/OFF circular illumination.

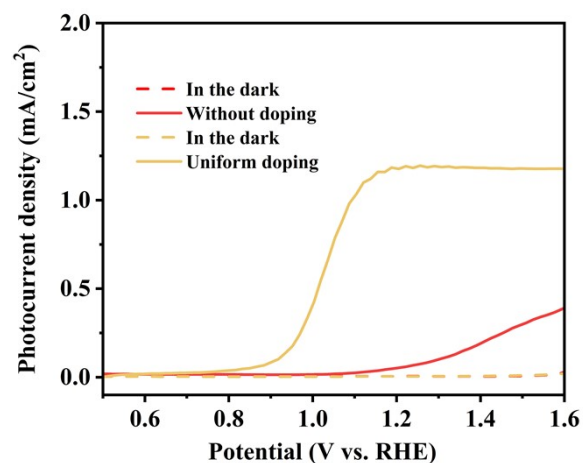

**Fig. S13**  $J$ - $V$  curves of the  $\alpha$ - $\text{Fe}_2\text{O}_3$  photoanodes with uniform Sn doping and without intentional Sn doping.

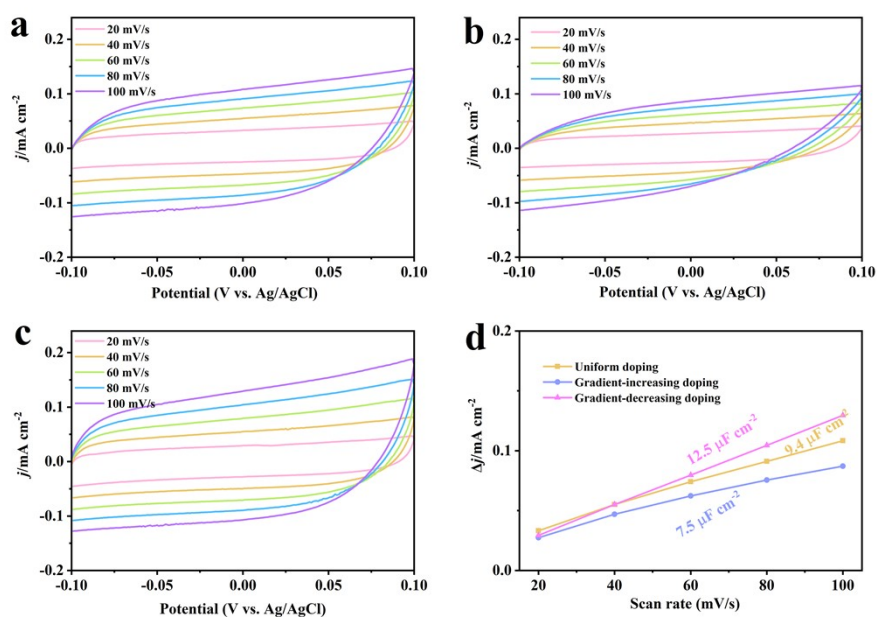

**Fig. S14** CV curves for the  $\alpha$ - $\text{Fe}_2\text{O}_3$  photoanodes with (a) uniform, (b) gradient-increasing or (c) gradient-decreasing doping of Sn. (d) Evaluation of  $C_{dl}$  values by plotting the  $\Delta j$  vs. scan rate.



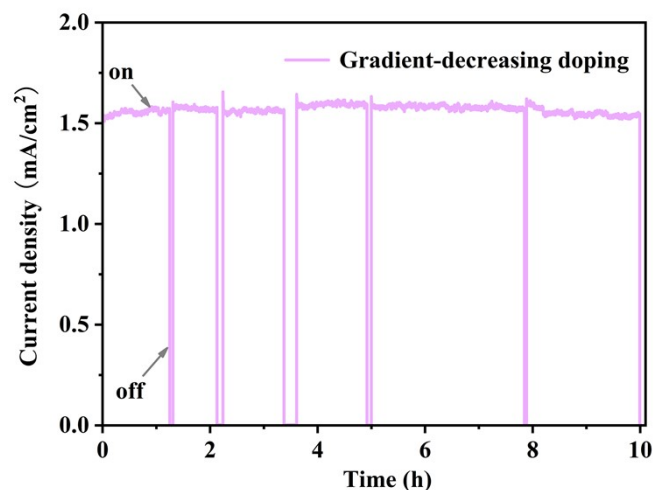

**Fig. S15**  $J-t$  behavior of the  $\alpha\text{-Fe}_2\text{O}_3$  photoanode with gradient-decreasing doping of Sn at 1.23  $V_{\text{RHE}}$  under the chopped AM 1.5G irradiation.

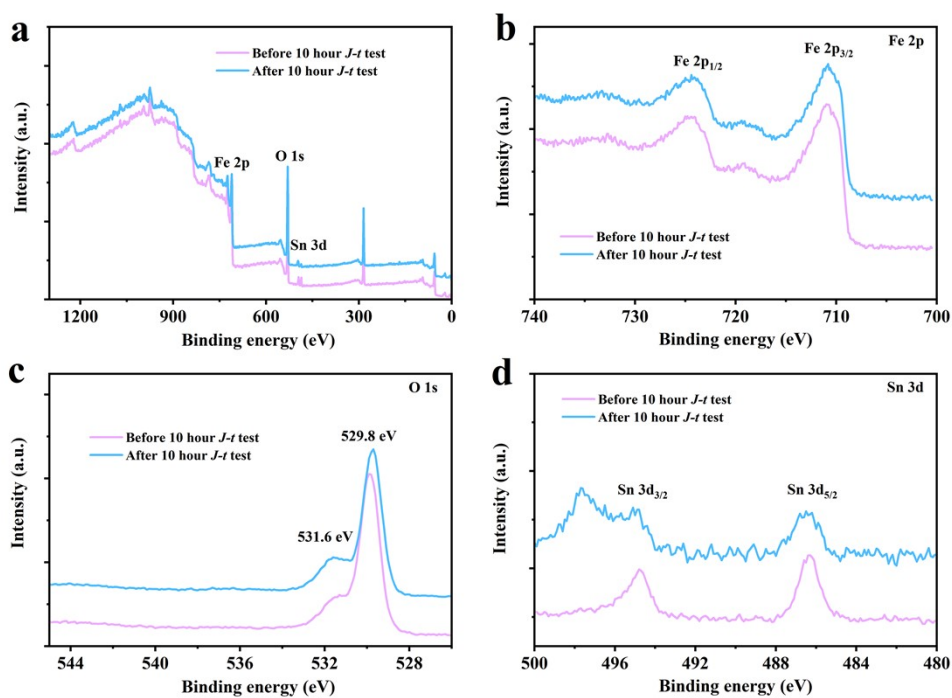

**Fig. S16** XPS spectra of the  $\alpha\text{-Fe}_2\text{O}_3$  photoanode with gradient-decreasing doping of Sn before and after 10 hour  $J-t$  test.

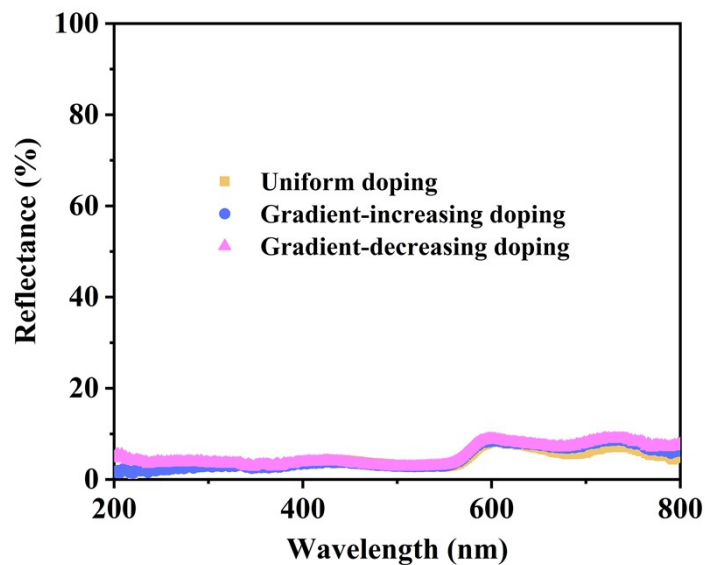

**Fig. S17** Reflectance spectra of the  $\alpha$ -Fe<sub>2</sub>O<sub>3</sub> photoanodes with uniform, gradient-increasing or gradient-decreasing doping of Sn.

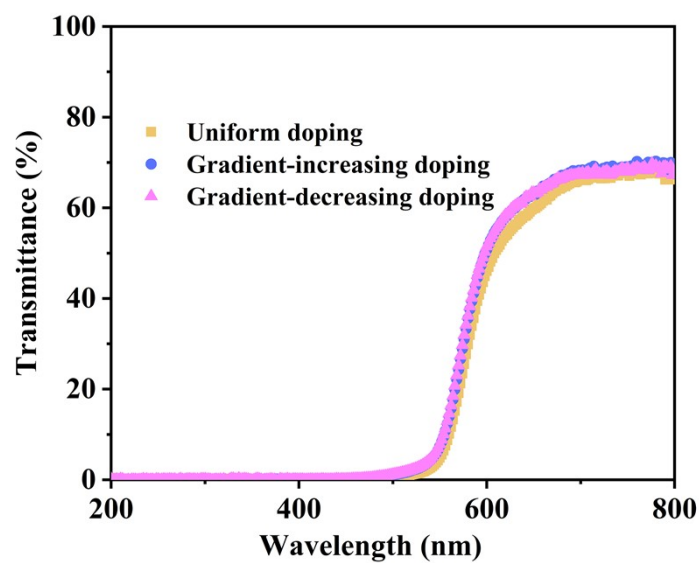

**Fig. S18** Transmittance spectra of the  $\alpha$ -Fe<sub>2</sub>O<sub>3</sub> photoanodes with uniform, gradient-increasing or gradient-decreasing doping of Sn.

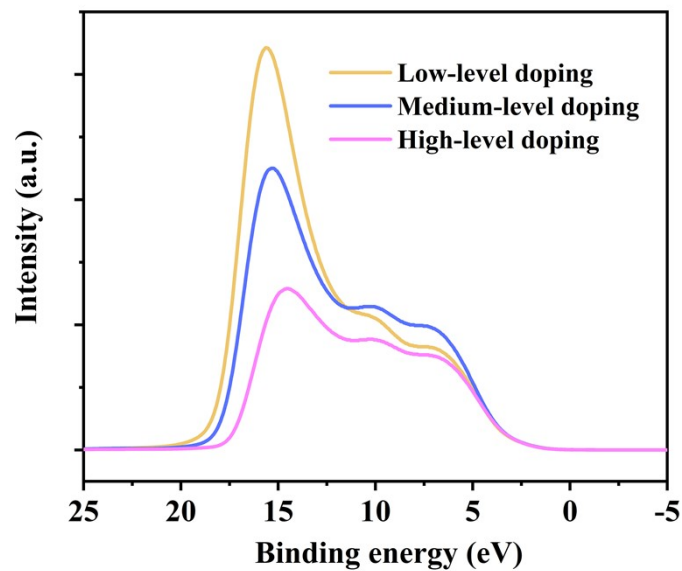

**Fig. S19** UPS spectra of the  $\alpha\text{-Fe}_2\text{O}_3$  photoanodes with low-level, medium-level or high-level doping of Sn.

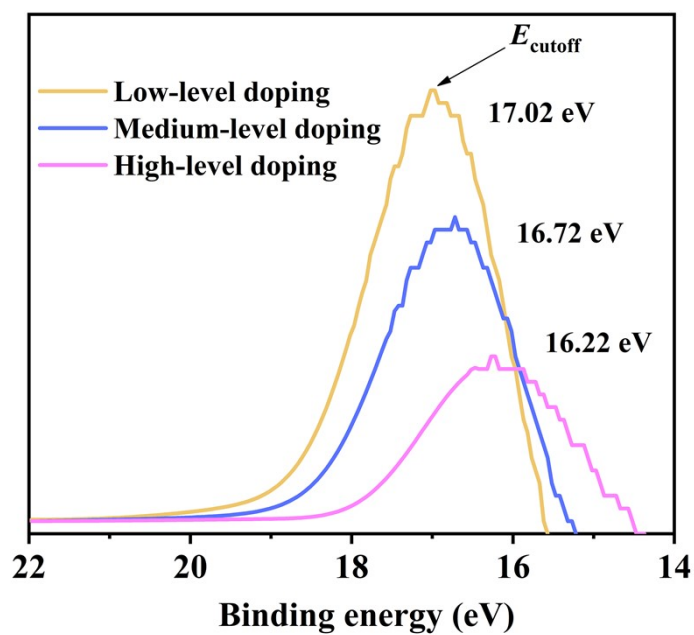

**Fig. S20** Determination of  $E_{\text{cutoff}}$ , at which the secondary photoemission begins from the UPS spectra.

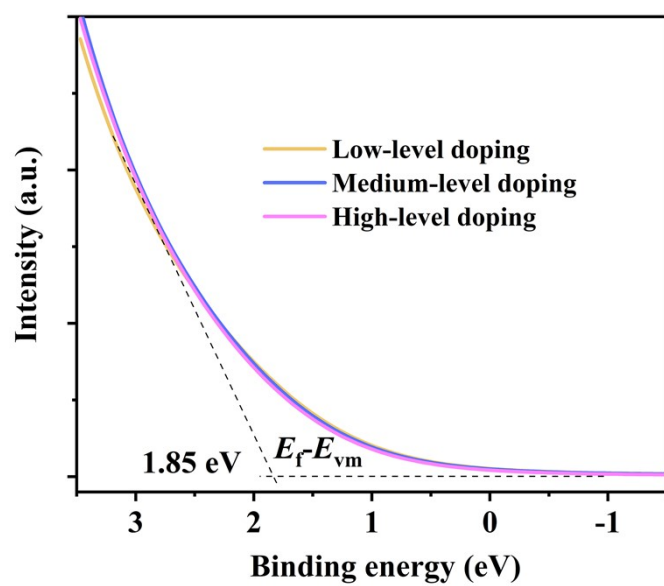

**Fig. S21** Determination of  $E_{VM}$ , which represents the valence band maximum from the UPS spectra.

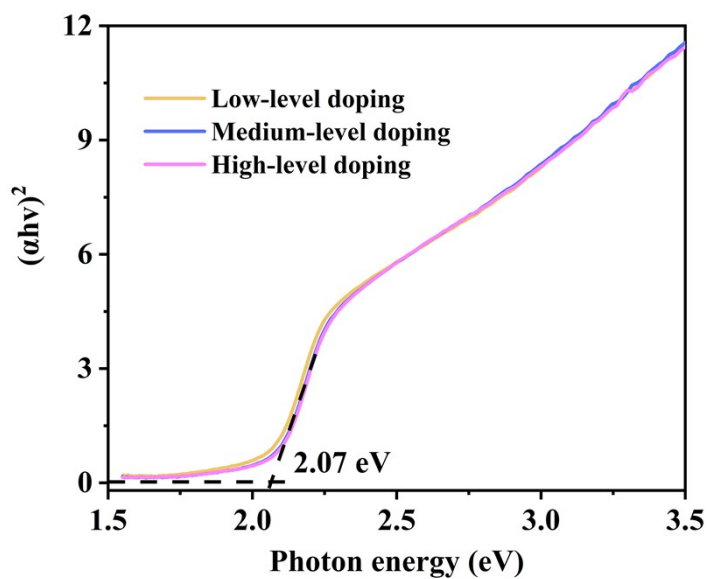

**Fig. S22** Band gap determination from the optical absorption spectra of the  $\alpha\text{-Fe}_2\text{O}_3$  photoanodes with low-level, medium-level or high-level doping of Sn.

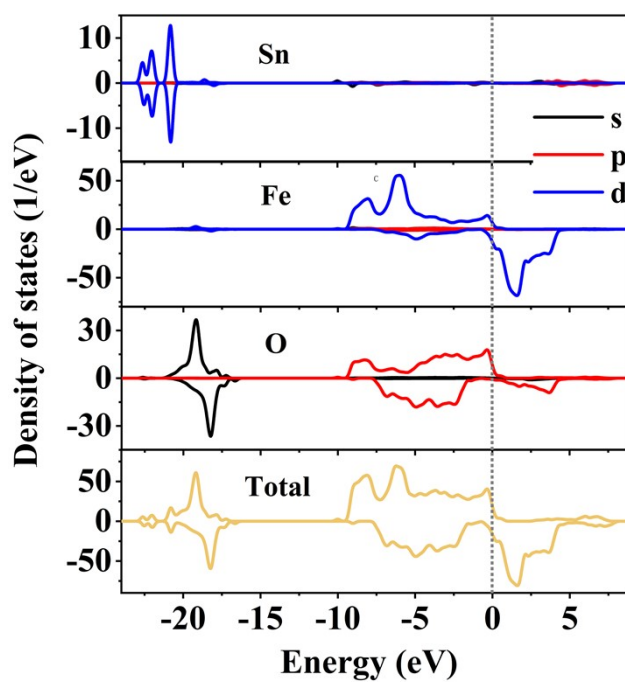

**Fig. S23** Total and partial density of states of the  $\alpha\text{-Fe}_2\text{O}_3$  photoanode with uniform doping for (110) surface.

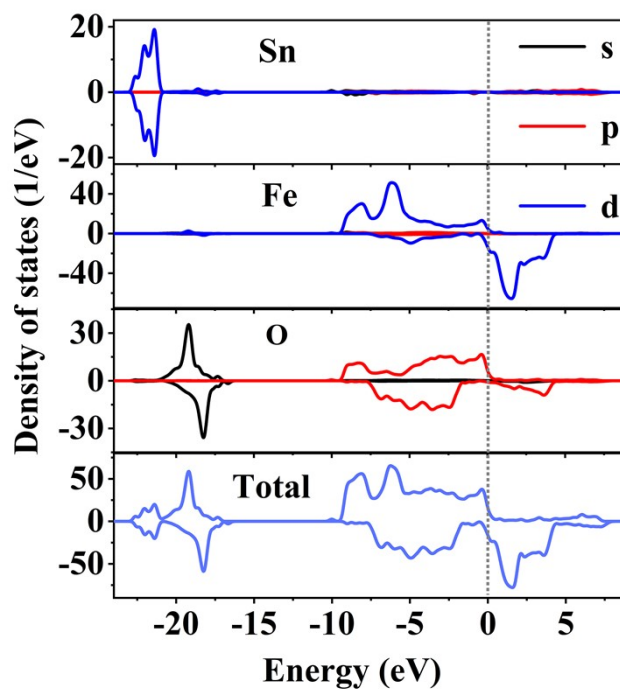

**Fig. S24** Total and partial density of states of the  $\alpha\text{-Fe}_2\text{O}_3$  photoanode with gradient-increasing doping for (110) surface.

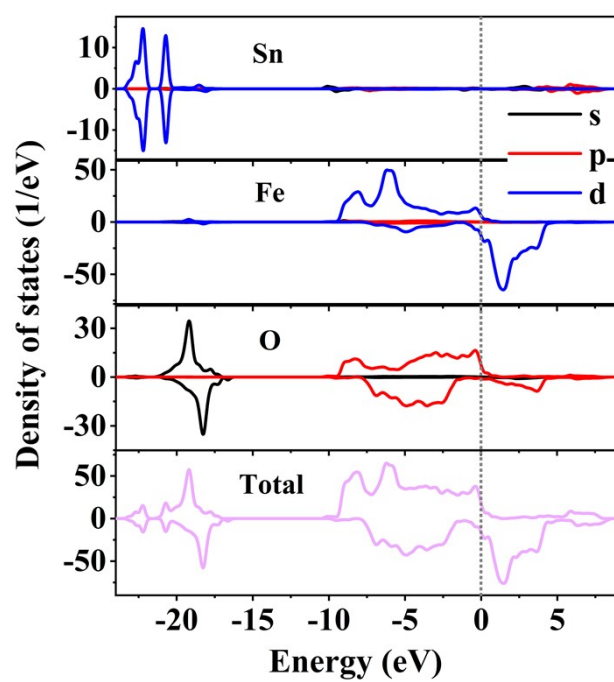

**Fig. S25** Total and partial density of states of the  $\alpha\text{-Fe}_2\text{O}_3$  film with gradient-decreasing doping for (110) surface.
